# Supplementary material
Source: PubMed Central journal article supplement (PMC7205881)
Supplement: 42003_2020_939_MOESM2_ESM.pdf [file 42003_2020_939_MOESM2_ESM.pdf]

## Description of Additional Supplementary Files

**File Name:** Supplementary Data 1

**Description:** Raw data used to make figures
