# Supplementary material
Source: PubMed Central journal article supplement (PMC7205881)
Supplement: 42003_2020_939_MOESM4_ESM.pdf [file 42003_2020_939_MOESM4_ESM.pdf]

## Reporting Summary

Nature Research wishes to improve the reproducibility of the work that we publish. This form provides structure for consistency and transparency in reporting. For further information on Nature Research policies, see [Authors & Referees](#) and the [Editorial Policy Checklist](#).

### Statistics

For all statistical analyses, confirm that the following items are present in the figure legend, table legend, main text, or Methods section.

n/a Confirmed

- The exact sample size ( $n$ ) for each experimental group/condition, given as a discrete number and unit of measurement
- A statement on whether measurements were taken from distinct samples or whether the same sample was measured repeatedly
- The statistical test(s) used AND whether they are one- or two-sided  
*Only common tests should be described solely by name; describe more complex techniques in the Methods section.*
- A description of all covariates tested
- A description of any assumptions or corrections, such as tests of normality and adjustment for multiple comparisons
- A full description of the statistical parameters including central tendency (e.g. means) or other basic estimates (e.g. regression coefficient) AND variation (e.g. standard deviation) or associated estimates of uncertainty (e.g. confidence intervals)
- For null hypothesis testing, the test statistic (e.g.  $F$ ,  $t$ ,  $r$ ) with confidence intervals, effect sizes, degrees of freedom and  $P$  value noted  
*Give  $P$  values as exact values whenever suitable.*
- For Bayesian analysis, information on the choice of priors and Markov chain Monte Carlo settings
- For hierarchical and complex designs, identification of the appropriate level for tests and full reporting of outcomes
- Estimates of effect sizes (e.g. Cohen's  $d$ , Pearson's  $r$ ), indicating how they were calculated

*Our web collection on [statistics for biologists](#) contains articles on many of the points above.*

### Software and code

Policy information about [availability of computer code](#)

Data collection

Azure c600 imaging system  
Odyssey imaging system  
Spectramax Gemini

Generation of translation initiation regions were carried out with three freely available in silico prediction tools.  
RBS calculator, version 2.1 [https://salislab.net/software/predict\\_rbs\\_calculator](https://salislab.net/software/predict_rbs_calculator)  
RBS designer, version 1.0.78 [http://ssbio.cau.ac.kr/web/?page\\_id=195](http://ssbio.cau.ac.kr/web/?page_id=195)  
UTR designer, online form [https://sbi.postech.ac.kr/utr\\_designer/](https://sbi.postech.ac.kr/utr_designer/)

Data analysis

Microsoft Excel 2016  
ImageJ  
Image Studio Lite  
GraphPad Prism8 (GraphPad Software)

For manuscripts utilizing custom algorithms or software that are central to the research but not yet described in published literature, software must be made available to editors/reviewers. We strongly encourage code deposition in a community repository (e.g. GitHub). See the Nature Research [guidelines for submitting code & software](#) for further information.

## Data

Policy information about [availability of data](#)

All manuscripts must include a [data availability statement](#). This statement should provide the following information, where applicable:

- Accession codes, unique identifiers, or web links for publicly available datasets
- A list of figures that have associated raw data
- A description of any restrictions on data availability

All data supporting this study are available within the article and its Supplementary Information file or are available from the corresponding author upon request.

## Field-specific reporting

Please select the one below that is the best fit for your research. If you are not sure, read the appropriate sections before making your selection.

Life sciences  Behavioural & social sciences  Ecological, evolutionary & environmental sciences

For a reference copy of the document with all sections, see [nature.com/documents/nr-reporting-summary-flat.pdf](https://nature.com/documents/nr-reporting-summary-flat.pdf)

## Life sciences study design

All studies must disclose on these points even when the disclosure is negative.

Sample size

Data exclusions

Replication

Randomization

Blinding

## Reporting for specific materials, systems and methods

We require information from authors about some types of materials, experimental systems and methods used in many studies. Here, indicate whether each material, system or method listed is relevant to your study. If you are not sure if a list item applies to your research, read the appropriate section before selecting a response.

### Materials & experimental systems

### Methods

n/a  Involved in the study

Antibodies

Eukaryotic cell lines

Palaeontology

Animals and other organisms

Human research participants

Clinical data

n/a  Involved in the study

ChIP-seq

Flow cytometry

MRI-based neuroimaging

## Antibodies

Antibodies used

Validation

2. Anti-MTH1 (Details from Certificate of Analysis)

Species Cross-reactivity: Human

Immunogen: GST-tagged recombinant human MTH1 C-terminal fragment.

Specificity: Clone 11A3.2 recognizes an epitope present in all four spliced isoforms of human NUDT1/MTH1 reported by UniProt (P36639).

Quality Assurance/Validation: Evaluated by Western Blotting in Jurkat cell lysate. Western Blotting Analysis: 1.0 µg/mL of this antibody detected MTH1 in 10 µg of Jurkat cell lysate.
